# Supplementary material
Source: publisher figshare collection journal article supplement (https://acs.figshare.com/ndownloader/files/4712305)
Supplement: Supplementary file 1 [file 4712305]

  
data_51115b 
  
_audit_creation_method            SHELXL-97 
_chemical_name_systematic 
; 
 ? 
; 
_chemical_name_common             ? 
_chemical_melting_point           ? 
_chemical_formula_moiety          ? 
_chemical_formula_sum 
 'C33 H40 O2 S2 Si2' 
_chemical_formula_weight          588.95 
  
loop_ 
 _atom_type_symbol 
 _atom_type_description 
 _atom_type_scat_dispersion_real 
 _atom_type_scat_dispersion_imag 
 _atom_type_scat_source 
 'C'  'C'   0.0033   0.0016 
 'International Tables Vol C Tables 4.2.6.8 and 6.1.1.4' 
 'H'  'H'   0.0000   0.0000 
 'International Tables Vol C Tables 4.2.6.8 and 6.1.1.4' 
 'O'  'O'   0.0106   0.0060 
 'International Tables Vol C Tables 4.2.6.8 and 6.1.1.4' 
 'S'  'S'   0.1246   0.1234 
 'International Tables Vol C Tables 4.2.6.8 and 6.1.1.4' 
 'Si'  'Si'   0.0817   0.0704 
 'International Tables Vol C Tables 4.2.6.8 and 6.1.1.4' 
  
_symmetry_cell_setting            Triclinic 
_symmetry_space_group_name_H-M    P-1 
  
loop_ 
 _symmetry_equiv_pos_as_xyz 
 'x, y, z' 
 '-x, -y, -z' 
  
_cell_length_a                    12.45(4) 
_cell_length_b                    12.94(4) 
_cell_length_c                    22.63(7) 
_cell_angle_alpha                 80.74(5) 
_cell_angle_beta                  86.74(5) 
_cell_angle_gamma                 79.99(6) 
_cell_volume                      3543(18) 
_cell_formula_units_Z             4 
_cell_measurement_temperature     293(2) 
_cell_measurement_reflns_used     801 
_cell_measurement_theta_min       2.23 
_cell_measurement_theta_max       16.54 
  
_exptl_crystal_description        ? 
_exptl_crystal_colour             ? 
_exptl_crystal_size_max           0.15 
_exptl_crystal_size_mid           0.10 
_exptl_crystal_size_min           0.02 
_exptl_crystal_density_meas       0 
_exptl_crystal_density_diffrn     1.104 
_exptl_crystal_density_method     'not measured' 
_exptl_crystal_F_000              1256 
_exptl_absorpt_coefficient_mu     0.243 
_exptl_absorpt_correction_type    multi-scan 
_exptl_absorpt_correction_T_min   0.9644 
_exptl_absorpt_correction_T_max   0.9952 
_exptl_absorpt_process_details    sadabs 
  
_exptl_special_details 
; 
 ? 
; 
  
_diffrn_ambient_temperature       293(2) 
_diffrn_radiation_wavelength      0.71073 
_diffrn_radiation_type            MoK\a 
_diffrn_radiation_source          'fine-focus sealed tube' 
_diffrn_radiation_monochromator   graphite 
_diffrn_measurement_device_type   'CCD area detector' 
_diffrn_measurement_method        'phi and omega scans' 
_diffrn_detector_area_resol_mean  ? 
_diffrn_standards_number          ? 
_diffrn_standards_interval_count  ? 
_diffrn_standards_interval_time   ? 
_diffrn_standards_decay_%         9.93 
_diffrn_reflns_number             16005 
_diffrn_reflns_av_R_equivalents   0.1938 
_diffrn_reflns_av_sigmaI/netI     0.7951 
_diffrn_reflns_limit_h_min        -14 
_diffrn_reflns_limit_h_max        14 
_diffrn_reflns_limit_k_min        -15 
_diffrn_reflns_limit_k_max        15 
_diffrn_reflns_limit_l_min        -26 
_diffrn_reflns_limit_l_max        21 
_diffrn_reflns_theta_min          0.91 
_diffrn_reflns_theta_max          25.01 
_reflns_number_total              12289 
_reflns_number_gt                 2110 
_reflns_threshold_expression      >2sigma(I) 
  
_computing_data_collection        'Bruker SMART' 
_computing_cell_refinement        'Bruker SMART' 
_computing_data_reduction         'Bruker SAINT' 
_computing_structure_solution     'SHELXS-97 (Sheldrick, 1990)' 
_computing_structure_refinement   'SHELXL-97 (Sheldrick, 1997)' 
_computing_molecular_graphics     'Bruker SHELXTL' 
_computing_publication_material   'Bruker SHELXTL' 
  
_refine_special_details 
; 
 Refinement of F^2^ against ALL reflections.  The weighted R-factor wR and 
 goodness of fit S are based on F^2^, conventional R-factors R are based 
 on F, with F set to zero for negative F^2^. The threshold expression of 
 F^2^ > 2sigma(F^2^) is used only for calculating R-factors(gt) etc. and is 
 not relevant to the choice of reflections for refinement.  R-factors based 
 on F^2^ are statistically about twice as large as those based on F, and R- 
 factors based on ALL data will be even larger. 
; 
  
_refine_ls_structure_factor_coef  Fsqd 
_refine_ls_matrix_type            full 
_refine_ls_weighting_scheme       calc 
_refine_ls_weighting_details 
 'calc w=1/[\s^2^(Fo^2^)+(0.0900P)^2^+0.0000P] where P=(Fo^2^+2Fc^2^)/3' 
_atom_sites_solution_primary      direct 
_atom_sites_solution_secondary    difmap 
_atom_sites_solution_hydrogens    geom 
_refine_ls_hydrogen_treatment     mixed 
_refine_ls_extinction_method      none 
_refine_ls_extinction_coef        ? 
_refine_ls_number_reflns          12289 
_refine_ls_number_parameters      703 
_refine_ls_number_restraints      0 
_refine_ls_R_factor_all           0.2879 
_refine_ls_R_factor_gt            0.0715 
_refine_ls_wR_factor_ref          0.2273 
_refine_ls_wR_factor_gt           0.1559 
_refine_ls_goodness_of_fit_ref    0.556 
_refine_ls_restrained_S_all       0.556 
_refine_ls_shift/su_max           0.354 
_refine_ls_shift/su_mean          0.025 
  
loop_ 
 _atom_site_label 
 _atom_site_type_symbol 
 _atom_site_fract_x 
 _atom_site_fract_y 
 _atom_site_fract_z 
 _atom_site_U_iso_or_equiv 
 _atom_site_adp_type 
 _atom_site_occupancy 
 _atom_site_symmetry_multiplicity 
 _atom_site_calc_flag 
 _atom_site_refinement_flags 
 _atom_site_disorder_assembly 
 _atom_site_disorder_group 
S1 S 0.4646(2) 0.9024(2) 0.28453(12) 0.0669(8) Uani 1 1 d . . . 
S2 S 0.2765(2) 0.8220(2) 0.07286(11) 0.0799(10) Uani 1 1 d . . . 
Si1 Si 0.4181(2) 0.7965(2) 0.42374(12) 0.0733(10) Uani 1 1 d . . . 
Si2 Si 0.1311(2) 0.6461(3) 0.06875(14) 0.0863(11) Uani 1 1 d . . . 
O1 O 0.5842(6) 0.8602(6) 0.2824(3) 0.127(3) Uani 1 1 d . . . 
O2 O 0.4271(6) 1.0100(6) 0.2913(3) 0.121(3) Uani 1 1 d . . . 
C1 C 0.3175(8) 0.8964(9) 0.4561(5) 0.075(3) Uani 1 1 d . . . 
C2 C 0.3277(9) 0.8800(9) 0.5263(4) 0.126(5) Uani 1 1 d . . . 
H2A H 0.2762 0.9331 0.5426 0.190 Uiso 1 1 calc R . . 
H2B H 0.4003 0.8862 0.5358 0.190 Uiso 1 1 calc R . . 
H2C H 0.3129 0.8108 0.5432 0.190 Uiso 1 1 calc R . . 
C3 C 0.3319(9) 1.0085(10) 0.4340(5) 0.152(6) Uani 1 1 d . . . 
H3A H 0.2774 1.0559 0.4527 0.229 Uiso 1 1 calc R . . 
H3B H 0.3244 1.0233 0.3914 0.229 Uiso 1 1 calc R . . 
H3C H 0.4031 1.0182 0.4438 0.229 Uiso 1 1 calc R . . 
C4 C 0.2001(8) 0.8896(10) 0.4408(6) 0.174(6) Uani 1 1 d . . . 
H4A H 0.1498 0.9430 0.4577 0.261 Uiso 1 1 calc R . . 
H4B H 0.1839 0.8207 0.4572 0.261 Uiso 1 1 calc R . . 
H4C H 0.1935 0.9008 0.3981 0.261 Uiso 1 1 calc R . . 
C5 C 0.5651(7) 0.8082(8) 0.4372(4) 0.121(4) Uani 1 1 d . . . 
H5A H 0.5756 0.8009 0.4795 0.181 Uiso 1 1 calc R . . 
H5B H 0.5797 0.8763 0.4181 0.181 Uiso 1 1 calc R . . 
H5C H 0.6140 0.7532 0.4209 0.181 Uiso 1 1 calc R . . 
C6 C 0.3952(10) 0.6589(7) 0.4546(4) 0.131(5) Uani 1 1 d . . . 
H6A H 0.4046 0.6462 0.4971 0.197 Uiso 1 1 calc R . . 
H6B H 0.4468 0.6085 0.4362 0.197 Uiso 1 1 calc R . . 
H6C H 0.3225 0.6512 0.4463 0.197 Uiso 1 1 calc R . . 
C7 C 0.3989(7) 0.8129(7) 0.3384(4) 0.064(3) Uani 1 1 d . . . 
C8 C 0.3386(7) 0.7671(7) 0.3062(5) 0.073(3) Uani 1 1 d . . . 
H8A H 0.2976 0.7165 0.3244 0.088 Uiso 1 1 calc R . . 
C9 C 0.3399(7) 0.8005(7) 0.2400(4) 0.057(3) Uani 1 1 d . . . 
C10 C 0.4047(7) 0.8729(7) 0.2214(4) 0.057(3) Uani 1 1 d . . . 
C11 C 0.2892(7) 0.7773(8) 0.1870(4) 0.061(3) Uani 1 1 d . . . 
C12 C 0.2235(7) 0.7054(7) 0.1702(4) 0.071(3) Uani 1 1 d . . . 
H12A H 0.1961 0.6538 0.1975 0.085 Uiso 1 1 calc R . . 
C13 C 0.2057(7) 0.7209(7) 0.1097(4) 0.060(3) Uani 1 1 d . . . 
C14 C 0.3228(6) 0.8430(7) 0.1381(4) 0.056(3) Uani 1 1 d . . . 
C15 C 0.1134(10) 0.5231(9) 0.1231(4) 0.164(6) Uani 1 1 d . . . 
H15A H 0.0720 0.5431 0.1578 0.246 Uiso 1 1 calc R . . 
H15B H 0.1837 0.4843 0.1350 0.246 Uiso 1 1 calc R . . 
H15C H 0.0755 0.4792 0.1042 0.246 Uiso 1 1 calc R . . 
C16 C -0.0004(8) 0.7289(11) 0.0475(6) 0.217(9) Uani 1 1 d . . . 
H16A H -0.0401 0.7482 0.0828 0.326 Uiso 1 1 calc R . . 
H16B H -0.0419 0.6899 0.0274 0.326 Uiso 1 1 calc R . . 
H16C H 0.0121 0.7920 0.0213 0.326 Uiso 1 1 calc R . . 
C17 C 0.2103(8) 0.6022(9) 0.0004(5) 0.079(3) Uani 1 1 d . . . 
C18 C 0.3254(10) 0.5593(8) 0.0153(5) 0.139(5) Uani 1 1 d . . . 
H18A H 0.3651 0.5394 -0.0198 0.209 Uiso 1 1 calc R . . 
H18B H 0.3282 0.4981 0.0458 0.209 Uiso 1 1 calc R . . 
H18C H 0.3574 0.6125 0.0297 0.209 Uiso 1 1 calc R . . 
C19 C 0.1540(8) 0.5262(8) -0.0260(5) 0.135(5) Uani 1 1 d . . . 
H19A H 0.1950 0.5053 -0.0606 0.203 Uiso 1 1 calc R . . 
H19B H 0.0819 0.5606 -0.0374 0.203 Uiso 1 1 calc R . . 
H19C H 0.1493 0.4645 0.0033 0.203 Uiso 1 1 calc R . . 
C20 C 0.2108(9) 0.7025(10) -0.0509(5) 0.135(5) Uani 1 1 d . . . 
H20A H 0.2525 0.6808 -0.0851 0.203 Uiso 1 1 calc R . . 
H20B H 0.2429 0.7554 -0.0363 0.203 Uiso 1 1 calc R . . 
H20C H 0.1372 0.7316 -0.0622 0.203 Uiso 1 1 calc R . . 
C21 C 0.4044(8) 0.9100(9) 0.1537(4) 0.057(3) Uani 1 1 d . . . 
C22 C 0.5214(9) 0.8795(11) 0.1230(4) 0.068(3) Uani 1 1 d . . . 
C23 C 0.5876(9) 0.7826(9) 0.1214(5) 0.083(4) Uani 1 1 d . . . 
H23A H 0.5690 0.7209 0.1436 0.100 Uiso 1 1 calc R . . 
C24 C 0.6859(10) 0.7790(13) 0.0847(6) 0.123(6) Uani 1 1 d . . . 
H24A H 0.7346 0.7156 0.0854 0.148 Uiso 1 1 calc R . . 
C25 C 0.7086(12) 0.8717(14) 0.0477(7) 0.124(7) Uani 1 1 d . . . 
H25A H 0.7687 0.8687 0.0213 0.149 Uiso 1 1 calc R . . 
C26 C 0.6427(11) 0.9636(14) 0.0510(5) 0.115(6) Uani 1 1 d . . . 
H26A H 0.6633 1.0244 0.0287 0.138 Uiso 1 1 calc R . . 
C27 C 0.5440(10) 0.9769(11) 0.0855(5) 0.072(3) Uani 1 1 d . . . 
C28 C 0.4570(12) 1.0665(13) 0.0941(5) 0.083(4) Uani 1 1 d . . . 
C29 C 0.4394(12) 1.1732(12) 0.0667(7) 0.110(5) Uani 1 1 d . . . 
H29A H 0.4892 1.1993 0.0385 0.132 Uiso 1 1 calc R . . 
C30 C 0.3485(18) 1.2364(13) 0.0825(7) 0.136(7) Uani 1 1 d . . . 
H30A H 0.3403 1.3084 0.0672 0.163 Uiso 1 1 calc R . . 
C31 C 0.2644(13) 1.2005(16) 0.1209(7) 0.139(6) Uani 1 1 d . . . 
H31A H 0.2017 1.2474 0.1289 0.167 Uiso 1 1 calc R . . 
C32 C 0.2770(9) 1.0916(11) 0.1471(6) 0.097(4) Uani 1 1 d . . . 
H32A H 0.2229 1.0646 0.1718 0.117 Uiso 1 1 calc R . . 
C33 C 0.3705(10) 1.0304(11) 0.1345(5) 0.073(3) Uani 1 1 d . . . 
S3 S 0.24509(19) 0.4238(2) 0.34248(14) 0.0651(8) Uani 1 1 d . . . 
S4 S -0.09481(18) 0.1773(2) 0.33768(11) 0.0677(8) Uani 1 1 d . . . 
Si3 Si 0.5007(2) 0.3472(2) 0.29989(12) 0.0665(9) Uani 1 1 d . . . 
Si4 Si -0.0694(2) -0.0406(2) 0.28615(12) 0.0592(9) Uani 1 1 d . . . 
O3 O 0.2701(5) 0.4216(5) 0.4045(3) 0.102(3) Uani 1 1 d . . . 
O4 O 0.2210(4) 0.5287(5) 0.3045(3) 0.088(2) Uani 1 1 d . . . 
C34 C 0.5254(8) 0.4174(10) 0.2207(5) 0.082(3) Uani 1 1 d . . . 
C35 C 0.4597(10) 0.5232(12) 0.2050(6) 0.209(8) Uani 1 1 d . . . 
H35A H 0.4769 0.5517 0.1644 0.314 Uiso 1 1 calc R . . 
H35B H 0.4755 0.5693 0.2314 0.314 Uiso 1 1 calc R . . 
H35C H 0.3836 0.5177 0.2088 0.314 Uiso 1 1 calc R . . 
C36 C 0.6574(8) 0.4138(9) 0.2138(5) 0.130(5) Uani 1 1 d . . . 
H36A H 0.6755 0.4478 0.1744 0.195 Uiso 1 1 calc R . . 
H36B H 0.6936 0.3412 0.2195 0.195 Uiso 1 1 calc R . . 
H36C H 0.6807 0.4502 0.2432 0.195 Uiso 1 1 calc R . . 
C37 C 0.5109(9) 0.3356(11) 0.1748(4) 0.175(7) Uani 1 1 d . . . 
H37A H 0.5221 0.3685 0.1343 0.263 Uiso 1 1 calc R . . 
H37B H 0.4386 0.3184 0.1798 0.263 Uiso 1 1 calc R . . 
H37C H 0.5634 0.2718 0.1834 0.263 Uiso 1 1 calc R . . 
C38 C 0.5788(7) 0.2089(7) 0.3141(4) 0.102(4) Uani 1 1 d . . . 
H38A H 0.5645 0.1775 0.3545 0.153 Uiso 1 1 calc R . . 
H38B H 0.6554 0.2109 0.3082 0.153 Uiso 1 1 calc R . . 
H38C H 0.5566 0.1675 0.2868 0.153 Uiso 1 1 calc R . . 
C39 C 0.5299(8) 0.4299(9) 0.3552(4) 0.140(5) Uani 1 1 d . . . 
H39A H 0.5181 0.3942 0.3951 0.210 Uiso 1 1 calc R . . 
H39B H 0.4824 0.4973 0.3491 0.210 Uiso 1 1 calc R . . 
H39C H 0.6044 0.4407 0.3501 0.210 Uiso 1 1 calc R . . 
C40 C 0.3462(6) 0.3403(7) 0.3080(4) 0.049(3) Uani 1 1 d . . . 
C41 C 0.3074(7) 0.2519(8) 0.2944(4) 0.078(3) Uani 1 1 d . . . 
H41A H 0.3482 0.1960 0.2776 0.093 Uiso 1 1 calc R . . 
C42 C 0.1852(7) 0.2636(7) 0.3121(4) 0.048(2) Uani 1 1 d . . . 
C43 C 0.1428(7) 0.3463(7) 0.3372(4) 0.051(3) Uani 1 1 d . . . 
C44 C 0.1018(7) 0.1942(8) 0.3103(4) 0.044(2) Uani 1 1 d . . . 
C45 C 0.0909(7) 0.0975(8) 0.2926(4) 0.065(3) Uani 1 1 d . . . 
H45A H 0.1471 0.0528 0.2760 0.079 Uiso 1 1 calc R . . 
C46 C -0.0148(7) 0.0777(6) 0.3033(3) 0.051(3) Uani 1 1 d . . . 
C47 C 0.0102(7) 0.2485(7) 0.3347(4) 0.051(3) Uani 1 1 d . . . 
C48 C -0.1870(6) -0.0599(7) 0.3397(4) 0.079(3) Uani 1 1 d . . . 
H48A H -0.1623 -0.0722 0.3800 0.118 Uiso 1 1 calc R . . 
H48B H -0.2172 -0.1199 0.3323 0.118 Uiso 1 1 calc R . . 
H48C H -0.2420 0.0026 0.3342 0.118 Uiso 1 1 calc R . . 
C49 C 0.0398(6) -0.1594(6) 0.2980(4) 0.071(3) Uani 1 1 d . . . 
H49A H 0.0615 -0.1721 0.3389 0.107 Uiso 1 1 calc R . . 
H49B H 0.1015 -0.1473 0.2720 0.107 Uiso 1 1 calc R . . 
H49C H 0.0128 -0.2202 0.2892 0.107 Uiso 1 1 calc R . . 
C50 C -0.1112(8) -0.0160(8) 0.2046(4) 0.068(3) Uani 1 1 d . . . 
C51 C -0.2064(9) 0.0783(10) 0.1931(4) 0.133(5) Uani 1 1 d . . . 
H51A H -0.2260 0.0888 0.1519 0.199 Uiso 1 1 calc R . . 
H51B H -0.1842 0.1414 0.2020 0.199 Uiso 1 1 calc R . . 
H51C H -0.2681 0.0632 0.2184 0.199 Uiso 1 1 calc R . . 
C52 C -0.0173(8) 0.0071(9) 0.1597(4) 0.124(5) Uani 1 1 d . . . 
H52A H -0.0432 0.0190 0.1196 0.186 Uiso 1 1 calc R . . 
H52B H 0.0411 -0.0525 0.1641 0.186 Uiso 1 1 calc R . . 
H52C H 0.0088 0.0691 0.1673 0.186 Uiso 1 1 calc R . . 
C53 C -0.1487(8) -0.1184(8) 0.1905(4) 0.121(5) Uani 1 1 d . . . 
H53A H -0.1707 -0.1072 0.1497 0.182 Uiso 1 1 calc R . . 
H53B H -0.2090 -0.1340 0.2167 0.182 Uiso 1 1 calc R . . 
H53C H -0.0893 -0.1769 0.1964 0.182 Uiso 1 1 calc R . . 
C54 C 0.0225(7) 0.3473(8) 0.3570(4) 0.051(3) Uani 1 1 d . . . 
C55 C -0.0564(8) 0.4477(9) 0.3320(6) 0.065(3) Uani 1 1 d . . . 
C56 C -0.0729(10) 0.4911(11) 0.2707(7) 0.089(4) Uani 1 1 d . . . 
H56A H -0.0319 0.4606 0.2404 0.107 Uiso 1 1 calc R . . 
C57 C -0.1520(13) 0.5801(15) 0.2577(7) 0.124(6) Uani 1 1 d . . . 
H57A H -0.1624 0.6088 0.2176 0.149 Uiso 1 1 calc R . . 
C58 C -0.2168(12) 0.6295(10) 0.3002(8) 0.112(5) Uani 1 1 d . . . 
H58A H -0.2689 0.6893 0.2891 0.134 Uiso 1 1 calc R . . 
C59 C -0.2008(10) 0.5852(12) 0.3620(7) 0.104(4) Uani 1 1 d . . . 
H59A H -0.2427 0.6160 0.3919 0.125 Uiso 1 1 calc R . . 
C60 C -0.1190(9) 0.4922(10) 0.3773(6) 0.063(3) Uani 1 1 d . . . 
C61 C -0.0822(8) 0.4291(9) 0.4360(5) 0.063(3) Uani 1 1 d . . . 
C62 C -0.1147(9) 0.4396(10) 0.4978(7) 0.095(4) Uani 1 1 d . . . 
H62A H -0.1714 0.4918 0.5073 0.114 Uiso 1 1 calc R . . 
C63 C -0.0540(12) 0.3643(12) 0.5442(6) 0.099(5) Uani 1 1 d . . . 
H63A H -0.0720 0.3692 0.5842 0.119 Uiso 1 1 calc R . . 
C64 C 0.0258(11) 0.2894(11) 0.5308(7) 0.116(5) Uani 1 1 d . . . 
H64A H 0.0629 0.2442 0.5621 0.139 Uiso 1 1 calc R . . 
C65 C 0.0569(9) 0.2751(9) 0.4725(6) 0.078(3) Uani 1 1 d . . . 
H65A H 0.1114 0.2197 0.4646 0.094 Uiso 1 1 calc R . . 
C66 C 0.0028(8) 0.3481(8) 0.4250(5) 0.057(3) Uani 1 1 d . . . 
  
loop_ 
 _atom_site_aniso_label 
 _atom_site_aniso_U_11 
 _atom_site_aniso_U_22 
 _atom_site_aniso_U_33 
 _atom_site_aniso_U_23 
 _atom_site_aniso_U_13 
 _atom_site_aniso_U_12 
S1 0.0616(19) 0.080(2) 0.0679(19) -0.0234(18) 0.0080(16) -0.0265(18) 
S2 0.100(2) 0.109(2) 0.0501(17) -0.0115(17) 0.0032(15) -0.073(2) 
Si1 0.079(2) 0.094(3) 0.0543(19) -0.0200(19) -0.0013(17) -0.0282(19) 
Si2 0.079(2) 0.127(3) 0.076(2) -0.045(2) 0.0145(18) -0.059(2) 
O1 0.115(7) 0.143(7) 0.131(7) -0.024(6) 0.012(6) -0.045(6) 
O2 0.151(7) 0.075(6) 0.150(7) -0.062(6) 0.022(6) -0.024(5) 
C1 0.079(8) 0.080(9) 0.081(9) -0.052(8) 0.005(6) -0.016(7) 
C2 0.149(11) 0.145(12) 0.069(8) -0.024(8) -0.009(8) 0.028(9) 
C3 0.165(13) 0.149(14) 0.158(13) -0.105(12) 0.019(10) 0.002(11) 
C4 0.066(9) 0.280(18) 0.204(15) -0.140(14) 0.033(9) -0.028(10) 
C5 0.060(7) 0.188(13) 0.120(10) -0.063(9) -0.041(7) 0.008(8) 
C6 0.232(14) 0.077(9) 0.087(9) -0.008(7) 0.008(9) -0.040(9) 
C7 0.076(7) 0.084(8) 0.035(6) 0.004(6) 0.008(5) -0.041(6) 
C8 0.056(7) 0.092(9) 0.089(9) -0.027(7) -0.013(6) -0.042(6) 
C9 0.068(7) 0.068(8) 0.037(7) -0.002(6) 0.019(6) -0.029(6) 
C10 0.056(6) 0.076(8) 0.055(7) -0.025(6) 0.005(5) -0.039(6) 
C11 0.059(6) 0.092(9) 0.033(6) -0.005(6) 0.008(5) -0.024(6) 
C12 0.074(7) 0.088(8) 0.071(8) -0.011(7) -0.007(6) -0.070(7) 
C13 0.064(7) 0.071(8) 0.057(7) -0.025(6) 0.001(6) -0.031(6) 
C14 0.051(6) 0.066(7) 0.067(8) -0.022(6) 0.018(5) -0.046(6) 
C15 0.258(16) 0.193(14) 0.087(9) -0.017(9) 0.023(10) -0.178(13) 
C16 0.055(8) 0.36(2) 0.290(19) -0.247(18) -0.036(10) 0.012(11) 
C17 0.062(7) 0.103(10) 0.076(8) -0.035(8) 0.000(7) -0.005(7) 
C18 0.151(13) 0.106(11) 0.177(14) -0.069(10) 0.005(11) -0.025(10) 
C19 0.144(11) 0.151(12) 0.148(12) -0.106(10) 0.021(9) -0.058(10) 
C20 0.183(13) 0.183(14) 0.062(8) -0.027(10) 0.013(8) -0.088(11) 
C21 0.064(7) 0.067(9) 0.043(7) -0.016(6) 0.007(5) -0.016(7) 
C22 0.074(9) 0.100(11) 0.050(7) -0.025(8) -0.005(6) -0.055(8) 
C23 0.073(9) 0.072(10) 0.103(10) -0.018(8) 0.000(8) -0.008(7) 
C24 0.063(9) 0.215(19) 0.110(12) -0.084(13) 0.016(9) -0.024(11) 
C25 0.064(10) 0.19(2) 0.122(14) -0.047(13) 0.031(10) -0.030(11) 
C26 0.088(11) 0.25(2) 0.044(7) -0.029(11) 0.023(8) -0.119(12) 
C27 0.093(10) 0.077(11) 0.060(8) -0.018(8) -0.015(8) -0.043(9) 
C28 0.120(12) 0.104(13) 0.046(8) -0.006(8) -0.018(8) -0.075(11) 
C29 0.148(14) 0.050(12) 0.131(13) 0.014(10) -0.028(12) -0.032(10) 
C30 0.25(2) 0.068(13) 0.106(13) 0.002(11) -0.048(15) -0.067(15) 
C31 0.171(17) 0.141(18) 0.118(14) -0.033(13) -0.032(12) -0.039(14) 
C32 0.074(9) 0.060(10) 0.143(12) -0.024(9) 0.023(8) 0.028(8) 
C33 0.086(9) 0.089(11) 0.059(8) -0.011(8) -0.013(7) -0.052(9) 
S3 0.0496(17) 0.077(2) 0.081(2) -0.0354(19) 0.0187(15) -0.0269(17) 
S4 0.0490(16) 0.081(2) 0.085(2) -0.0324(17) 0.0220(14) -0.0322(15) 
Si3 0.0467(17) 0.093(3) 0.071(2) -0.0274(19) 0.0088(15) -0.0323(18) 
Si4 0.0506(18) 0.069(2) 0.067(2) -0.0246(17) 0.0068(15) -0.0250(17) 
O3 0.069(5) 0.169(7) 0.099(6) -0.074(6) 0.025(4) -0.066(5) 
O4 0.062(4) 0.051(5) 0.149(7) -0.013(5) 0.027(4) -0.010(4) 
C34 0.070(8) 0.109(10) 0.072(8) -0.004(8) 0.012(6) -0.037(7) 
C35 0.140(13) 0.177(17) 0.235(17) 0.123(14) 0.067(12) 0.021(12) 
C36 0.097(9) 0.191(13) 0.117(10) -0.020(9) 0.049(8) -0.083(9) 
C37 0.157(12) 0.34(2) 0.068(9) -0.046(12) 0.016(8) -0.155(14) 
C38 0.062(7) 0.083(9) 0.152(11) -0.003(8) 0.005(7) -0.006(6) 
C39 0.105(9) 0.237(14) 0.134(10) -0.120(11) 0.019(8) -0.102(10) 
C40 0.035(5) 0.060(7) 0.062(7) -0.025(6) 0.010(5) -0.022(5) 
C41 0.059(7) 0.126(10) 0.053(7) -0.030(7) 0.029(5) -0.023(7) 
C42 0.048(7) 0.049(7) 0.045(6) -0.016(5) 0.007(5) -0.002(6) 
C43 0.047(6) 0.061(7) 0.058(6) -0.023(6) 0.021(5) -0.041(6) 
C44 0.029(6) 0.054(7) 0.049(6) -0.013(5) 0.006(5) -0.008(6) 
C45 0.053(7) 0.080(8) 0.072(7) -0.031(6) 0.025(5) -0.026(6) 
C46 0.053(6) 0.055(7) 0.056(6) -0.027(5) 0.014(5) -0.028(5) 
C47 0.047(6) 0.056(7) 0.064(7) -0.020(6) 0.016(5) -0.037(6) 
C48 0.062(6) 0.088(8) 0.092(8) -0.015(6) 0.023(6) -0.039(6) 
C49 0.050(6) 0.086(8) 0.080(7) -0.022(6) 0.003(5) -0.008(6) 
C50 0.064(7) 0.061(8) 0.074(8) -0.006(6) -0.012(6) 0.009(6) 
C51 0.129(11) 0.189(15) 0.089(9) -0.018(10) -0.017(9) -0.048(11) 
C52 0.102(9) 0.214(14) 0.069(8) -0.018(9) 0.024(7) -0.072(9) 
C53 0.144(11) 0.156(12) 0.100(9) -0.061(9) -0.014(8) -0.084(9) 
C54 0.039(6) 0.052(8) 0.063(7) -0.023(6) 0.022(5) -0.008(6) 
C55 0.048(7) 0.080(10) 0.082(9) -0.037(9) 0.028(7) -0.042(7) 
C56 0.059(9) 0.106(12) 0.107(13) -0.023(10) 0.007(8) -0.022(8) 
C57 0.112(14) 0.178(19) 0.110(13) -0.034(13) 0.013(12) -0.095(13) 
C58 0.118(13) 0.074(11) 0.139(14) 0.023(11) -0.030(12) -0.032(9) 
C59 0.064(9) 0.109(13) 0.152(14) -0.045(11) 0.027(9) -0.037(9) 
C60 0.034(7) 0.061(9) 0.100(11) -0.023(8) 0.022(7) -0.022(6) 
C61 0.050(7) 0.060(9) 0.091(10) -0.034(8) 0.033(7) -0.036(7) 
C62 0.069(9) 0.109(12) 0.140(12) -0.082(11) 0.061(9) -0.066(9) 
C63 0.134(14) 0.120(15) 0.068(9) -0.026(10) 0.026(10) -0.089(11) 
C64 0.100(11) 0.134(15) 0.125(14) -0.043(11) 0.031(10) -0.042(10) 
C65 0.084(9) 0.076(10) 0.081(9) -0.035(8) 0.032(8) -0.021(7) 
C66 0.045(7) 0.039(8) 0.088(10) -0.020(7) 0.019(7) -0.009(6) 
  
_geom_special_details 
; 
 All esds (except the esd in the dihedral angle between two l.s. planes) 
 are estimated using the full covariance matrix.  The cell esds are taken 
 into account individually in the estimation of esds in distances, angles 
 and torsion angles; correlations between esds in cell parameters are only 
 used when they are defined by crystal symmetry.  An approximate (isotropic) 
 treatment of cell esds is used for estimating esds involving l.s. planes. 
; 
  
loop_ 
 _geom_bond_atom_site_label_1 
 _geom_bond_atom_site_label_2 
 _geom_bond_distance 
 _geom_bond_site_symmetry_2 
 _geom_bond_publ_flag 
S1 O2 1.420(8) . ? 
S1 O1 1.496(9) . ? 
S1 C10 1.771(9) . ? 
S1 C7 1.805(9) . ? 
S2 C14 1.694(9) . ? 
S2 C13 1.775(9) . ? 
Si1 C1 1.848(10) . ? 
Si1 C6 1.869(11) . ? 
Si1 C5 1.909(10) . ? 
Si1 C7 1.932(10) . ? 
Si2 C16 1.837(12) . ? 
Si2 C13 1.833(9) . ? 
Si2 C15 1.886(11) . ? 
Si2 C17 1.898(11) . ? 
C1 C3 1.494(14) . ? 
C1 C4 1.541(12) . ? 
C1 C2 1.579(13) . ? 
C7 C8 1.344(9) . ? 
C8 C9 1.489(12) . ? 
C9 C10 1.342(11) . ? 
C9 C11 1.482(11) . ? 
C10 C21 1.532(12) . ? 
C11 C14 1.375(11) . ? 
C11 C12 1.448(11) . ? 
C12 C13 1.376(11) . ? 
C14 C21 1.534(11) . ? 
C17 C18 1.481(12) . ? 
C17 C19 1.514(11) . ? 
C17 C20 1.598(13) . ? 
C21 C33 1.538(13) . ? 
C21 C22 1.592(13) . ? 
C22 C23 1.380(12) . ? 
C22 C27 1.463(13) . ? 
C23 C24 1.438(14) . ? 
C24 C25 1.410(17) . ? 
C25 C26 1.333(17) . ? 
C26 C27 1.418(14) . ? 
C27 C28 1.472(14) . ? 
C28 C29 1.405(15) . ? 
C28 C33 1.463(13) . ? 
C29 C30 1.342(18) . ? 
C30 C31 1.416(18) . ? 
C31 C32 1.423(17) . ? 
C32 C33 1.334(13) . ? 
S3 O3 1.449(7) . ? 
S3 O4 1.478(7) . ? 
S3 C40 1.745(9) . ? 
S3 C43 1.773(8) . ? 
S4 C47 1.718(8) . ? 
S4 C46 1.746(9) . ? 
Si3 C39 1.861(9) . ? 
Si3 C38 1.870(10) . ? 
Si3 C34 1.908(11) . ? 
Si3 C40 1.938(10) . ? 
Si4 C49 1.862(9) . ? 
Si4 C48 1.872(9) . ? 
Si4 C46 1.882(9) . ? 
Si4 C50 1.909(11) . ? 
C34 C35 1.468(14) . ? 
C34 C36 1.636(13) . ? 
C34 C37 1.636(13) . ? 
C40 C41 1.400(10) . ? 
C41 C42 1.539(11) . ? 
C42 C43 1.308(10) . ? 
C42 C44 1.493(11) . ? 
C43 C54 1.538(11) . ? 
C44 C47 1.368(10) . ? 
C44 C45 1.404(11) . ? 
C45 C46 1.386(10) . ? 
C47 C54 1.484(11) . ? 
C50 C52 1.543(12) . ? 
C50 C51 1.546(12) . ? 
C50 C53 1.563(11) . ? 
C54 C55 1.535(13) . ? 
C54 C66 1.544(13) . ? 
C55 C60 1.390(12) . ? 
C55 C56 1.423(14) . ? 
C56 C57 1.383(16) . ? 
C57 C58 1.384(15) . ? 
C58 C59 1.435(15) . ? 
C59 C60 1.443(14) . ? 
C60 C61 1.494(13) . ? 
C61 C66 1.397(12) . ? 
C61 C62 1.455(14) . ? 
C62 C63 1.458(14) . ? 
C63 C64 1.320(14) . ? 
C64 C65 1.387(14) . ? 
C65 C66 1.428(12) . ? 
  
loop_ 
 _geom_angle_atom_site_label_1 
 _geom_angle_atom_site_label_2 
 _geom_angle_atom_site_label_3 
 _geom_angle 
 _geom_angle_site_symmetry_1 
 _geom_angle_site_symmetry_3 
 _geom_angle_publ_flag 
O2 S1 O1 120.2(4) . . ? 
O2 S1 C10 109.8(5) . . ? 
O1 S1 C10 108.8(4) . . ? 
O2 S1 C7 111.6(5) . . ? 
O1 S1 C7 108.6(5) . . ? 
C10 S1 C7 95.0(5) . . ? 
C14 S2 C13 92.4(5) . . ? 
C1 Si1 C6 111.0(6) . . ? 
C1 Si1 C5 112.7(5) . . ? 
C6 Si1 C5 108.9(5) . . ? 
C1 Si1 C7 109.4(5) . . ? 
C6 Si1 C7 106.0(4) . . ? 
C5 Si1 C7 108.6(4) . . ? 
C16 Si2 C13 108.3(5) . . ? 
C16 Si2 C15 112.0(6) . . ? 
C13 Si2 C15 105.0(5) . . ? 
C16 Si2 C17 110.9(6) . . ? 
C13 Si2 C17 112.8(5) . . ? 
C15 Si2 C17 107.8(6) . . ? 
C3 C1 C4 105.7(10) . . ? 
C3 C1 C2 106.0(8) . . ? 
C4 C1 C2 109.5(10) . . ? 
C3 C1 Si1 113.9(8) . . ? 
C4 C1 Si1 111.3(7) . . ? 
C2 C1 Si1 110.1(7) . . ? 
C8 C7 S1 105.5(6) . . ? 
C8 C7 Si1 131.3(7) . . ? 
S1 C7 Si1 123.2(5) . . ? 
C7 C8 C9 117.4(8) . . ? 
C10 C9 C11 108.5(8) . . ? 
C10 C9 C8 113.2(9) . . ? 
C11 C9 C8 138.3(9) . . ? 
C9 C10 C21 113.7(8) . . ? 
C9 C10 S1 108.9(8) . . ? 
C21 C10 S1 137.3(7) . . ? 
C14 C11 C12 112.0(8) . . ? 
C14 C11 C9 106.9(8) . . ? 
C12 C11 C9 141.0(9) . . ? 
C13 C12 C11 113.2(9) . . ? 
C12 C13 S2 109.5(6) . . ? 
C12 C13 Si2 128.0(7) . . ? 
S2 C13 Si2 122.3(6) . . ? 
C11 C14 C21 113.1(8) . . ? 
C11 C14 S2 112.8(7) . . ? 
C21 C14 S2 133.7(7) . . ? 
C18 C17 C19 113.7(10) . . ? 
C18 C17 C20 107.3(9) . . ? 
C19 C17 C20 105.3(8) . . ? 
C18 C17 Si2 110.2(8) . . ? 
C19 C17 Si2 110.8(7) . . ? 
C20 C17 Si2 109.4(7) . . ? 
C33 C21 C14 114.4(8) . . ? 
C33 C21 C10 115.1(8) . . ? 
C14 C21 C10 97.7(8) . . ? 
C33 C21 C22 105.9(9) . . ? 
C14 C21 C22 112.0(7) . . ? 
C10 C21 C22 111.9(8) . . ? 
C23 C22 C27 122.2(11) . . ? 
C23 C22 C21 131.4(11) . . ? 
C27 C22 C21 105.7(11) . . ? 
C22 C23 C24 118.6(12) . . ? 
C25 C24 C23 120.0(15) . . ? 
C26 C25 C24 119.1(16) . . ? 
C25 C26 C27 125.7(15) . . ? 
C26 C27 C28 135.6(14) . . ? 
C26 C27 C22 114.1(12) . . ? 
C28 C27 C22 110.3(12) . . ? 
C29 C28 C27 131.7(14) . . ? 
C29 C28 C33 117.2(15) . . ? 
C27 C28 C33 110.7(13) . . ? 
C30 C29 C28 118.0(18) . . ? 
C29 C30 C31 124.2(19) . . ? 
C30 C31 C32 119.1(18) . . ? 
C33 C32 C31 116.6(14) . . ? 
C32 C33 C28 124.6(13) . . ? 
C32 C33 C21 128.2(12) . . ? 
C28 C33 C21 107.0(13) . . ? 
O3 S3 O4 117.6(4) . . ? 
O3 S3 C40 110.6(4) . . ? 
O4 S3 C40 110.2(4) . . ? 
O3 S3 C43 110.9(4) . . ? 
O4 S3 C43 111.2(4) . . ? 
C40 S3 C43 93.9(5) . . ? 
C47 S4 C46 92.5(5) . . ? 
C39 Si3 C38 112.3(5) . . ? 
C39 Si3 C34 109.5(5) . . ? 
C38 Si3 C34 112.7(5) . . ? 
C39 Si3 C40 106.9(4) . . ? 
C38 Si3 C40 108.5(4) . . ? 
C34 Si3 C40 106.7(4) . . ? 
C49 Si4 C48 110.0(4) . . ? 
C49 Si4 C46 108.9(4) . . ? 
C48 Si4 C46 107.0(4) . . ? 
C49 Si4 C50 109.0(4) . . ? 
C48 Si4 C50 112.4(4) . . ? 
C46 Si4 C50 109.6(4) . . ? 
C35 C34 C36 115.0(10) . . ? 
C35 C34 C37 113.0(10) . . ? 
C36 C34 C37 99.6(9) . . ? 
C35 C34 Si3 115.5(9) . . ? 
C36 C34 Si3 105.3(7) . . ? 
C37 C34 Si3 107.0(7) . . ? 
C41 C40 S3 111.8(6) . . ? 
C41 C40 Si3 120.2(6) . . ? 
S3 C40 Si3 127.3(5) . . ? 
C40 C41 C42 107.9(8) . . ? 
C43 C42 C44 110.0(8) . . ? 
C43 C42 C41 117.1(8) . . ? 
C44 C42 C41 132.7(9) . . ? 
C42 C43 C54 113.4(7) . . ? 
C42 C43 S3 109.2(7) . . ? 
C54 C43 S3 137.3(7) . . ? 
C47 C44 C45 116.2(8) . . ? 
C47 C44 C42 103.2(8) . . ? 
C45 C44 C42 140.5(9) . . ? 
C46 C45 C44 110.8(8) . . ? 
C45 C46 S4 111.0(6) . . ? 
C45 C46 Si4 126.5(7) . . ? 
S4 C46 Si4 122.5(5) . . ? 
C44 C47 C54 116.7(7) . . ? 
C44 C47 S4 109.5(7) . . ? 
C54 C47 S4 133.5(7) . . ? 
C52 C50 C51 107.9(9) . . ? 
C52 C50 C53 107.0(8) . . ? 
C51 C50 C53 109.0(8) . . ? 
C52 C50 Si4 113.4(7) . . ? 
C51 C50 Si4 111.1(7) . . ? 
C53 C50 Si4 108.3(7) . . ? 
C47 C54 C55 116.0(8) . . ? 
C47 C54 C43 96.6(7) . . ? 
C55 C54 C43 115.3(8) . . ? 
C47 C54 C66 116.5(8) . . ? 
C55 C54 C66 100.5(8) . . ? 
C43 C54 C66 112.9(8) . . ? 
C60 C55 C56 121.1(12) . . ? 
C60 C55 C54 111.7(12) . . ? 
C56 C55 C54 127.1(11) . . ? 
C57 C56 C55 117.8(13) . . ? 
C58 C57 C56 124.5(16) . . ? 
C57 C58 C59 117.8(15) . . ? 
C58 C59 C60 119.3(12) . . ? 
C55 C60 C59 119.6(12) . . ? 
C55 C60 C61 108.1(12) . . ? 
C59 C60 C61 132.3(12) . . ? 
C66 C61 C62 118.6(11) . . ? 
C66 C61 C60 108.4(10) . . ? 
C62 C61 C60 133.0(12) . . ? 
C63 C62 C61 116.8(12) . . ? 
C64 C63 C62 121.8(14) . . ? 
C63 C64 C65 123.1(15) . . ? 
C64 C65 C66 117.9(11) . . ? 
C61 C66 C65 121.8(10) . . ? 
C61 C66 C54 110.9(10) . . ? 
C65 C66 C54 127.2(10) . . ? 
  
_diffrn_measured_fraction_theta_max    0.984 
_diffrn_reflns_theta_full              25.01 
_diffrn_measured_fraction_theta_full   0.984 
_refine_diff_density_max    0.542 
_refine_diff_density_min   -0.433 
_refine_diff_density_rms    0.096 
  
